1 **Whole genome sequencing for predicting clarithromycin resistance in *Mycobacterium***  
2 ***abscessus***

3  
4 Samuel Lipworth<sup>1\*</sup>, Natasha Hough<sup>1\*</sup>, Laura Leach<sup>2</sup>, Marcus Morgan<sup>2</sup>, Katie Jeffery<sup>2</sup>, Monique  
5 Andersson<sup>2</sup>, Esther Robinson<sup>3</sup>, E. Grace Smith<sup>3</sup>, Derrick Crook<sup>1</sup>, Tim Peto<sup>1</sup> and Timothy  
6 Walker<sup>1</sup>

7  
8 \*Contributed equally

9  
10 <sup>1</sup> Nuffield Department of Medicine, University of Oxford, John Radcliffe Hospital, Oxford, UK,  
11 OX3 9DU

12 <sup>2</sup> Oxford University Hospitals NHS Foundation Trust, John Radcliffe Hospital, Oxford, UK, OX3  
13 9DU

14 <sup>3</sup> Public Health England Regional Mycobacterial Reference Laboratory, Birmingham Heartlands  
15 Hospital, Birmingham, UK, B9 5SS

16  
17 **Running title:** WGS for *M. abscessus* clarithromycin susceptibility prediction

18  
19 Corresponding author:

20 Samuel Lipworth

21 Email: [samuel.lipworth@medsci.ox.ac.uk](mailto:samuel.lipworth@medsci.ox.ac.uk),

22 Tel: 07743448071

23

24

25

26

27

28 **Abstract**

29

30

31 *Mycobacterium abscessus* is emerging as an important pathogen in chronic lung diseases with  
32 concern regarding patient to patient transmission. The recent introduction of routine whole  
33 genome sequencing (WGS) as a replacement for existing reference techniques in England  
34 provides an opportunity to characterise the genetic determinants of resistance. We conducted a  
35 systematic review to catalogue all known resistance determining mutations. This knowledge  
36 was used to construct a predictive algorithm based on mutations in the *erm(41)* and *rrl* genes  
37 which was tested on a collection of 203 sequentially acquired clinical isolates for which there  
38 was paired genotype/phenotype data. A search for novel resistance determining mutations was  
39 conducted using an heuristic algorithm.

40

41 The sensitivity of existing knowledge for predicting resistance in clarithromycin was 95% (95%  
42 CI 89 - 98%) and the specificity was 66% (95% CI 54 – 76%). Subspecies alone was a poor  
43 predictor of resistance to clarithromycin. Eight potential new resistance conferring SNPs were  
44 identified. WGS demonstrates probable resistance determining SNPs in regions the NTM-DR  
45 line probe cannot detect. These mutations are potentially clinically important as they all  
46 occurred in samples predicted to be inducibly resistant, and for which a macrolide would  
47 therefore currently be indicated. We were unable to explain all resistance, raising the possibility  
48 of the involvement of other as yet unidentified genes.

49

50

51

52

53

54

## 55 **Introduction**

56

57 The *Mycobacterium abscessus complex* (*M. abscessus*) are rapidly growing nontuberculous  
58 mycobacterium (NTM) of increasing clinical concern with a rising burden of associated  
59 pulmonary disease (Prevots et al. 2010). *M. abscessus* poses a significant problem, particularly  
60 in patients with cystic fibrosis (CF), where infection is associated with a more rapid decline in  
61 lung function and can be a barrier to transplantation (Esther et al. 2010). Of particular concern  
62 are the findings from recent work that have suggested person-to-person transmission of virulent  
63 clones amongst the CF population within a healthcare setting (Bryant et al. 2013, 2016),  
64 although not all studies have supported this (Harris et al. 2014; Tortoli et al. 2017).

65

66 The taxonomy of *M. abscessus* is contentious. It is currently divided into three subspecies: *M.*  
67 *abscessus* subspecies *abscessus* (*Mabs*), *M. abscessus* subspecies *massiliense* (*Mmas*), and  
68 *M. abscessus* subspecies *bolletii* (*Mbol*) (Adekambi et al. 2017). The organism has intrinsic  
69 resistance to multiple antibiotics including  $\beta$ -lactams, rifampicin and aminoglycosides due to the  
70 synergistic action of the cell envelope and genetic factors (Nessar et al. 2012). Treatment  
71 requires prolonged courses of multiple antibiotics, but outcomes are thought to vary across the  
72 different subspecies. *Mmas* has been associated with clarithromycin susceptibility and  
73 favourable treatment outcomes, whereas *Mabs* has been associated with inducible macrolide  
74 resistance and poorer treatment outcomes (Koh et al. 2011).

75

76 Whole genome sequencing has been implemented in stages across England since December  
77 2016, replacing existing reference techniques for mycobacterial identification. As a  
78 consequence, there is now the opportunity to explore the molecular determinants of drug

79 resistance for all clinical NTM isolates. Macrolides are important agents in the management of  
80 NTM infection, The American Thoracic Society/Infectious Diseases Society of America and  
81 British Thoracic Society (ATS/IDSA and BTS) guidelines recommend including a macrolide in  
82 treatment regimens where samples are either susceptible, or demonstrate inducible resistance  
83 (Haworth et al. 2017; Griffith et al. 2007).. They act by binding to the 50S ribosomal subunit and  
84 resistance in mycobacteria primarily occurs through target site modification for example by erm  
85 methylases and point mutations (Nash, Brown-Elliott, and Wallace 2009).As there is a  
86 particularly strong correlation between *in vitro* susceptibility and clinical response to macrolide  
87 treatment of *M. abscessus* (Jeon et al. 2009; Choi et al. 2017), we have undertaken a study to  
88 assess the feasibility of predicting clarithromycin susceptibility from whole genome sequencing  
89 data for all three subspecies of *M. abscessus*.

90

## 91 **Methods**

92

### 93 **Literature search**

94

95 We first conducted a systematic review of the literature to search for known drug resistance  
96 conferring mutations in *M. abscessus*. Pubmed was searched with the terms '*Mycobacterium*  
97 *abscessus*' AND 'clarithromycin' OR 'macrolide' OR 'drug resistance' OR 'antibiotic resistance',  
98 looking for English language articles published up to April 2018. To be included in the final list,  
99 articles had to contain genotyping of coding regions relevant to clarithromycin resistance in *M.*  
100 *abscessus* in addition to paired drug susceptibility data. Studies looking at both clinical and  
101 non-clinical samples were included. 298 abstracts were screened for relevance and 81 full text  
102 articles were obtained of which 26 met the inclusion criteria (Figure 1).

103

### 104 **Sample selection and sequencing**

105

106 We next sought all available clinical isolates (N = 180) which had undergone whole genome  
107 sequencing by the Public Health England (PHE) laboratory in Birmingham (UK) as part of the  
108 routine diagnostic workflow, and for which paired phenotypic data were also available. We  
109 supplemented this with 23 isolates for which the same data was available from a WGS archive  
110 at the University of Oxford. Isolates were collected between May 2014 and January 2017 and  
111 no prior selection according to site of isolation nor whether confirmed *M. abscessus* complex  
112 disease by guidelines was made. Clinical samples were cultured in BD BACTEC™ MGIT™  
113 liquid mycobacterial growth indicator tubes from which an aliquot was removed to be prepared  
114 for WGS as previously described (Votintseva et al. 2015).

115

116 Libraries for Illumina Miseq sequencing were prepared using the Illumina Nextera XT protocol  
117 with manual library normalisation. Samples were batched 12 to 16 per flow cell and paired end  
118 sequencing was performed with the MiSeq reagent kit V2. Bioinformatics was performed using  
119 the PHE bioinformatics pipeline as previously described (Walker et al. 2015; Votintseva et al.  
120 2015). Briefly, reads were mapped to the *Mabs* reference genome (NC\_010397.1) with Stampy  
121 v1.22 and variants called using Samtools v0.1.18 (Only variants with  $\geq 5$  high-quality reads,  
122 mean quality per base  $\geq 25$  and  $> 90\%$  high-quality bases were retained as variants;  
123 heterozygous variants with  $>10\%$  minor variant were not retained). A self-self blast approach  
124 was used to mask repetitive regions. Sub-species were identified by computing maximum  
125 likelihood (ML) phylogenetic trees incorporating published representative isolates from each  
126 subspecies. A whole genome SNP alignment was used as input to IQ-TREE OMP version 1.5.5  
127 using a generalised time reversible model. The *erm(41)* and *rplV* genes were manually  
128 inspected for insertions/deletions from aligned fasta files using Seaview version 4.6.2. All newly  
129 sequenced data has been uploaded to NCBI under project accession number PRJNA420644.

130

## 131 **Drug susceptibility testing**

132

133 Phenotypic drug susceptibility testing (DST) was performed at the PHE National Mycobacterial  
134 reference service in London. DST was performed using the broth microdilution method with 96-  
135 well RAPMYCO microtitre plates (Mueller Hinton medium with TES buffer, Thermo Fisher).

136 Plates were read at day three post-inoculation, and if poor growth again at day 5, according to  
137 Clinical and Laboratory Standards Institute (CLSI) guidelines (Committee for Clinical Laboratory  
138 Standards 2000). Isolates deemed susceptible or intermediate were re-incubated and read again at days  
139 7, 14 and 21. Those found to be resistant (R MIC  $\geq$  8  $\mu$ g/ml) at any of these time points are described as  
140 phenotypically resistant. A call of phenotypically sensitive (S MIC  $\leq$  2  $\mu$ g/ml) or intermediate (I MIC  $>$   
141 2 - < 8  $\mu$ g/ml) was only made after the full 21 days of incubation. This study was an opportunistic  
142 retrospective analysis of routinely collected clinical data and as such phenotypic testing was not repeated  
143 on discordant isolates.

144

## 145 **Genotypic prediction of clarithromycin susceptibility**

146

147 We used BioPython software to extract base calls from whole genome sequence FASTA files,  
148 comparing these to a list of genomic loci which our literature search indicated were associated  
149 with clarithromycin resistance (table 2). We then predicted phenotypes using an hierarchical  
150 algorithm (Figure 2). A resistant phenotype was predicted where any mutations were present at  
151 *rrl* positions 2270 or 2271 (*E. coli* numbering 2058/2059), or where the less well characterized  
152 *rrl\_A2269G* or *rrl\_A2293C* or *rrl\_G2281A* mutations were seen. In the absence of these  
153 mutations, susceptibility was predicted where an isolate had a truncated *erm(41)* gene or a C  
154 nucleotide at position 28 in *erm(41)*. Inducible resistance was predicted where a wild type call  
155 (T) was present at position 28 in *erm41*. However, if an *erm41\_C19T* mutation was also  
156 present, susceptibility was predicted instead of inducible resistance. In cases where there was a

157 null call at *rrl* 2270/2271, we subsequently attempted local assembly of the *rrl* gene using Ariba  
158 (Hunt et al. 2017), followed by comparison by alignment against the reference. Where this was  
159 not possible due to low coverage in this region, no prediction was made. Statistics quoted were  
160 calculated using R Studio v1.1.383.

161

## 162 **Search for novel resistance conferring mutations**

163

164 We attempted to characterise new resistance mutations within genes linked to drug resistance  
165 from the literature search. To maximise power for discovering new potential resistance  
166 mutations, we included all genomes available to us. All variants in these genes or their  
167 promoter regions were extracted using Python software from variant call files. Phylogenetic  
168 SNPs were identified by considering each subspecies in turn, assumed to be benign and  
169 excluded from further analysis.

170

171 We considered variants at the level of SNPs in promoter regions or rRNA and amino acid  
172 changes in coding regions. A mutation (a variant with an observable phenotype) was  
173 characterised as causing resistance if it occurred as the only variant in the relevant region in a  
174 resistant isolate or if it was always associated with resistance when it was seen and did not co-  
175 occur with any other mutations known to cause resistance. Variants were characterised as  
176 consistent with susceptibility ('benign') if all isolates were susceptible when it occurred alone or  
177 if it occurred only in susceptible isolates. We assumed no prior knowledge in this section of the  
178 analysis and the identification of known resistance SNPs was used as an internal validation of  
179 our approach.

180

## 181 **Results**

182

183 We studied 143 *Mabs*, 20 *Mbol* and 40 *Mmas* genomes. Genotypic predictions were made on  
184 the basis of mutations identified by the literature search. All relevant mutations identified were  
185 contained in the genes *rrl* and *erm(41)* (figure 2 and table 2). The genes *rplV*, *whiB7* and *rpld*  
186 were also considered of potential interest and were additionally searched for variants.

187

## 188 **Genotypic predictions**

189

190 Inducible resistance was predicted in 101 isolates, of which, 74/101 (73%) were reported as  
191 phenotypically resistant. After excluding isolates for which no prediction could be made due to  
192 missing data in key genomic loci (n = 20) as well as those with an intermediate phenotype (n =  
193 4), the sensitivity was 95/100 (95%, 95% CI 89 - 98%) and specificity was 52/79 (66%, 95% CI  
194 54 - 76%) . The very major error rate (phenotype resistant, WGS prediction sensitive) was 5/100  
195 5% (95% CI 1 – 9%) and the major error rate (phenotype susceptible, WGS prediction  
196 resistant) was 27/79, 34% (95% CI 24 – 44%). Positive predictive value was 95/122, 78% (95%  
197 CI 69 - 85%) and the negative predictive value was 52/57, 91% (95% CI 81 - 97%) (Table 3). The  
198 F score for WGS predictions was 0.86. When isolates with a prediction of inducible resistance  
199 were further excluded, the specificity of a resistance prediction was 21/21 (100%, 95% CI 93 -  
200 100%) and the sensitivity was 21/26 (81%, 95% CI 61 - 93%).

201

## 202 **Clarithromycin resistance in the subspecies**

203

204 81/143 *Mabs* were resistant, 58 sensitive and 4 intermediate. For *Mbol* 18/20 were resistant  
205 and for *Mmas* 19/40 were resistant (table 1). There was one *Mmas* isolate carrying a full length  
206 *erm(41)* gene which was phenotypically resistant to clarithromycin. This was not unexpected  
207 from a genotypic perspective as it harboured a wild type thymine nucleotide at position 28  
208 *erm(41)*, associated with inducible resistance.



209

## 210 **Mechanisms of resistance**

211

212 The negative predictive value of a truncated *erm(41)* gene for clarithromycin susceptibility was  
213 53% (21/39 - there was one *Mmas* isolate with a full length *erm(41)*). In 11/18 instances,  
214 resistance in the presence of a truncated *erm(41)* could be explained by a mutation in position  
215 2270 or 2271 in *rrl*. No coverage at all was seen at these positions for 4/18 isolates. No genomic  
216 explanation could be identified for the remaining three discordant isolates (table 1).

217

218 All isolates which had any mutation of positions 2269, 2270 or 2271 (E. Coli numbering 2057,  
219 2058, 2059) in *rrl* were resistant to clarithromycin (21/203 (10%)). Such a mutation was found in  
220 3 *Mbol*, 11 *Mmas* and 7 *Mabs* isolates. We did not observe any isolates with an *rrl* mutation  
221 which also harboured a T28C mutation in *erm(41)*. Where this occurred in isolates reported in  
222 the literature, they were always resistant (Kehrmann et al. 2016; Rubio et al. 2015).

223

224 Of 37 isolates with a T28C mutation in *erm(41)* and no other relevant mutations, 84% (31/37)  
225 were susceptible to clarithromycin, 11% (4/31) had intermediate susceptibility and 5% (2/31)  
226 were resistant. This mutation was exclusively found in *Mabs* isolates. We did not identify any  
227 drug resistance associated mutations in any of these intermediate or resistant isolates. Across  
228 all three subspecies, of 101 isolates with the T28\_erm41 call associated with inducible  
229 resistance (and no other relevant mutation), 73% (74/101) were resistant and 27% (27/101)  
230 susceptible at the final day 21 reading.

231

## 232 **De novo search for resistance determining mutations**

233

234 The search for potential novel resistance determining mutations for clarithromycin revealed 13  
235 SNPs of interest (table 4). Of these, five have previously been described in the literature.  
236 There were additionally four SNPs (*rrl\_A2746T*, *rrl\_G836A*, *rrl\_T2674G* and *rrl\_T636C*) which  
237 were only ever seen in resistant isolates but always co-occurred with known resistance  
238 determining SNPs. There was one phenotypically resistant isolate which harboured 18 novel  
239 SNPs. On performing a nucleotide BLAST of a 120 base region encompassing all of these  
240 SNPs, there was a 99% ( $E 2 \times 10^{-53}$ ) match with *Streptococcus species*. This therefore likely  
241 represents sample contamination with flora from the nasopharynx. No new resistance  
242 associated variants were discovered in *rplV*, *rplD* or *whiB7*.

243

## 244 Discussion

245

246 We conducted a systematic review of drug resistance determining mutations for clarithromycin  
247 in *M. abscessus* and used the results to make genotypic predictions. The sensitivity of this  
248 approach was 95% (95% CI 89 – 98%) and the positive predictive value 78% (95% CI 69 –  
249 85%). The prevalence of resistance amongst our collection of isolates was high compared to  
250 that which has been reported elsewhere (Koh et al. 2011; Hatakeyama et al. 2017; Li et al.  
251 2016; Cowman et al. 2016).

252

253 These results show that for clarithromycin, drug resistance can be predicted from WGS data as  
254 it has been previously through targeted PCR and line probe assays such as the Hain GenoType  
255 NTM-DR. Assessment of the genotype of *erm(41)* with molecular diagnostics allows prediction  
256 of its functional status which has been thought to correlate to treatment outcome (Haworth et al.  
257 2017). Similarly, as the absence of a functional *erm(41)* gene has been associated with good  
258 therapeutic outcomes its molecular detection ought to be beneficial to patients (Koh et al. 2011),  
259 although in our study this alone was not an adequate predictor of in vitro resistance. A

260 genotypic prediction of inducible resistance produced a variable phenotype in our study (27/101  
261 sensitive). Discriminating such isolates predicted to be inducibly resistant which are  
262 unexpectedly sensitive after prolonged incubation with clarithromycin or show early time point  
263 high level resistance may help to identify additional genotypic markers to better identify patients  
264 more likely to benefit from the use of macrolides...

265  
266 In addition to mutations identified in the literature search, we also managed to identify variants  
267 that may plausibly be new resistance determining mutations. However, these will require  
268 validation against an independent data set. Using routinely collected diagnostic data to improve  
269 our understanding of the molecular determinants of drug resistance is a key advantage WGS  
270 has over line-probe assays or PCR. The eight previously undescribed mutations we report in  
271 this work could be of clinical importance because they all occur in samples which the existing  
272 literature predicts to be inducibly resistant. As BTS guidelines recommend that patients with  
273 such isolates should be given a macrolide, it is important to determine further whether these  
274 SNPs are true resistance-determinants, and whether macrolide therapy should be avoided in  
275 their presence.

276  
277 Previous authors have suggested that it is clinically useful to discriminate between subspecies,  
278 (Koh et al. 2011) as *Mmas* is typically associated with durable susceptibility to clarithromycin  
279 and *Mbol* and *Mabs* with inducible resistance (unless the T28C mutation is present). We found  
280 identifying sub-species alone to be an inadequate predictor of *in vitro* clarithromycin phenotype.  
281 There were three *Mmas* isolates in our collection that were resistant to clarithromycin and had  
282 no mutations known to be relevant. Mougari and colleagues found that in 39/40 *Mmas* selected  
283 for clarithromycin resistance, this could be explained by an *rrl* mutation at positions 2270/2271  
284 with a further sample containing an *rpIV* insertion (Mougari et al. 2017). All of our isolates

285 contained this 'insertion' (also present in the NC\_010397.1 reference) which was associated with  
286 susceptibility to clarithromycin except in the presence of a relevant *rrl* mutation.

287  
288 In keeping with previous reports, we identified an isolate of *Mmas* with a full length *erm(41)* and  
289 a thymine nucleotide at position 28(Shallom et al. 2015). This likely represents recombination  
290 between the subspecies. A recent study showed the Hain GenoType NTM-DR line probe assay  
291 incorrectly predicted subspecies in 8% of samples, presumably because it lacks the whole  
292 genome resolution provided by sequencing and is vulnerable to between species recombination  
293 (Kehrmann et al. 2016).

294  
295 Despite analysing all mutations occurring in *erm(41)* and *rrl* for the full collection of genomes,  
296 we were unable to predict all clarithromycin resistance. This may be because there are other  
297 genes implicated or due to unreliable DST results. Future work should aim to select discordant  
298 genotypes and identify additional infrequently occurring genetic loci implicated in clarithromycin  
299 resistance, for example by using genome wide association (GWAS) approaches. All of the new  
300 clarithromycin resistance mutations we discovered occurred in isolates which we originally  
301 predicted to be inducibly resistant. Although *M. abscessus* is primarily thought to be an  
302 environmental organism, these patients may be colonised for long periods with subsequent  
303 potential exposure to multiple courses of macrolides. An alternative hypothesis may therefore  
304 be that some or all of these SNPs are compensatory mutations which act to reduce a fitness  
305 cost of the expression of *erm*, which has been experimentally demonstrated in other bacteria  
306 (Gupta et al. 2013). There were four SNPs which only occurred in resistant samples but were  
307 always seen with a known drug resistance causing SNP, possibly also representing  
308 compensatory mutations.

309

310 Key weaknesses of our study include that we were unable establish a temporal relationship  
311 between antibiotic prescribing and inducible phenotypic resistance as we did not have the  
312 relevant ethics approval to link to patient records. If for example, any SNPs on our list of novel  
313 mutations were observed in isolates from patients who had never previously had macrolide  
314 therapy, it would be much more likely that they were genuine resistance conferring rather than  
315 compensatory mutations. In addition it is possible that some of the genomes were same patient  
316 replicates over a number of months/years, although this may have also diversified the range of  
317 mutations observed. We chose to include all available samples to maximise detection of low  
318 frequency resistance determining SNPs meaning there was no validation set available. Our list  
319 of novel resistance determining SNPs will therefore require validation on an independent  
320 dataset before being applied to the clinical setting. We chose to target a select list of genes with  
321 known SNPs identified in the literature search; other approaches such as GWAS will likely be  
322 additive to the knowledge base we present here.

323  
324 In summary, WGS allows identification of known resistance conferring mutations as well as  
325 demonstrating probable novel resistance determining SNPs in regions the Hain NTM-DR line  
326 probe cannot detect which if further validated may change management. Identification of  
327 subspecies alone inadequately predicts macrolide resistance in *M. abscessus*. Our data does  
328 not support the replacement of phenotypic tests at this point in time; as more paired  
329 genome/DST data becomes available in the near future, and we learn more about the molecular  
330 determinants of drug resistance, it is likely that sensitivity and specificity of WGS resistance  
331 prediction will improve. Given that WGS data is already being produced in the UK for the  
332 purposes of molecular epidemiology, it would now be possible to phase out existing molecular  
333 tests and replicate their results *in silico* at no additional cost.

334

335 **Transparency declaration**

336 The authors have no conflicts of interest to declare.

### 337 **Funding**

338 No specific funding was acquired for this work. All sequencing data was created as part of the  
339 routine PHE clinical diagnostic service.

340

### 341 **References**

- 342 Bastian, Sylvaine, Nicolas Veziris, Anne-Laure Roux, Florence Brossier, Jean-Louis Gaillard,  
343 Vincent Jarlier, and Emmanuelle Cambau. 2011. "Assessment of Clarithromycin  
344 Susceptibility in Strains Belonging to the Mycobacterium Abscessus Group by erm(41) and  
345 Rrl Sequencing." *Antimicrobial Agents and Chemotherapy* 55 (2): 775–81.
- 346 Brown-Elliott, Barbara A., Sruthi Vasireddy, Ravikiran Vasireddy, Elena Iakhiaeva, Susan T.  
347 Howard, Kevin Nash, Nicholas Parodi, et al. 2015. "Utility of Sequencing the erm(41) Gene  
348 in Isolates of Mycobacterium Abscessus Subsp. Abscessus with Low and Intermediate  
349 Clarithromycin MICs." *Journal of Clinical Microbiology* 53 (4): 1211–15.
- 350 Bryant, Josephine M., Dorothy M. Grogono, Daniel Greaves, Juliet Foweraker, Iain Roddick,  
351 Thomas Inns, Mark Reacher, et al. 2013. "Whole-Genome Sequencing to Identify  
352 Transmission of Mycobacterium Abscessus between Patients with Cystic Fibrosis: A  
353 Retrospective Cohort Study." *The Lancet* 381 (9877): 1551–60.
- 354 Bryant, Josephine M., Dorothy M. Grogono, Daniela Rodriguez-Rincon, Isobel Everall, Karen P.  
355 Brown, Pablo Moreno, Deepshikha Verma, et al. 2016. "Emergence and Spread of a  
356 Human-Transmissible Multidrug-Resistant Nontuberculous Mycobacterium." *Science* 354  
357 (6313): 751–57.
- 358 Carvalho, Natalia F. G. de, Fernando Pavan, Daisy N. Sato, Clarice Q. F. Leite, Robert D.  
359 Arbeit, and Erica Chimara. 2018. "Genetic Correlates of Clarithromycin Susceptibility  
360 among Isolates of the Mycobacterium Abscessus Group and the Potential Clinical  
361 Applicability of a PCR-Based Analysis of erm(41)." *The Journal of Antimicrobial  
362 Chemotherapy* 73 (4): 862–66.
- 363 Chew, Ka Lip, Janet W. S. Cheng, Nurul Huda Osman, Raymond T. P. Lin, and Jeanette W. P.  
364 Teo. 2017. "Predominance of Clarithromycin-Susceptible Mycobacterium Massiliense  
365 Subspecies: Characterization of the Mycobacterium Abscessus Complex at a Tertiary  
366 Acute Care Hospital." *Journal of Medical Microbiology* 66 (10): 1443–47.
- 367 Choi, Hayoung, Su-Young Kim, Dae Hun Kim, Hee Jae Huh, Chang-Seok Ki, Nam Yong Lee,  
368 Seung-Heon Lee, et al. 2017. "Clinical Characteristics and Treatment Outcomes of Patients  
369 with Acquired Macrolide-Resistant Mycobacterium Abscessus Lung Disease." *Antimicrobial  
370 Agents and Chemotherapy* 61 (10). <https://doi.org/10.1128/AAC.01146-17>.
- 371 Chua, Kyra Y. L., Andrea Bustamante, Peter Jelfs, Sharon C-A Chen, and Vitali Sintchenko.  
372 2015. "Antibiotic Susceptibility of Diverse Mycobacterium Abscessus Complex Strains in  
373 New South Wales, Australia." *Pathology* 47 (7): 678–82.
- 374 Committee for Clinical Laboratory Standards, National. 2000. "Susceptibility Testing  
375 Mycobacteria, Nocardia, and Other Aerobic Actinomycetes: Tentative Standard."
- 376 Cowman, S., K. Burns, S. Benson, R. Wilson, and M. R. Loebinger. 2016. "The Antimicrobial  
377 Susceptibility of Non-Tuberculous Mycobacteria." *The Journal of Infection* 72 (3): 324–31.
- 378 Esther, Charles R., Jr, Denise A. Esserman, Peter Gilligan, Alan Kerr, and Peadar G. Noone.  
379 2010. "Chronic Mycobacterium Abscessus Infection and Lung Function Decline in Cystic



- 380 Fibrosis." *Journal of Cystic Fibrosis: Official Journal of the European Cystic Fibrosis Society*  
381 9 (2): 117–23.
- 382 Griffith, David E., Timothy Aksamit, Barbara A. Brown-Elliott, Antonino Catanzaro, Charles  
383 Daley, Fred Gordin, Steven M. Holland, et al. 2007. "An Official ATS/IDSA Statement:  
384 Diagnosis, Treatment, and Prevention of Nontuberculous Mycobacterial Diseases."  
385 *American Journal of Respiratory and Critical Care Medicine* 175 (4): 367–416.
- 386 Gupta, Pulkit, Shanmugapriya Sothiselvam, Nora Vázquez-Laslop, and Alexander S. Mankin.  
387 2013. "Deregulation of Translation due to Post-Transcriptional Modification of rRNA  
388 Explains Why *erm* Genes Are Inducible." *Nature Communications* 4 (June): ncomms2984.
- 389 Hanson, Kimberly E., E. Susan Slechta, Haleina Muir, and Adam P. Barker. 2014. "Rapid  
390 Molecular Detection of Inducible Macrolide Resistance in *Mycobacterium Chelonae* and *M.*  
391 *Abscessus* Strains: A Replacement for 14-Day Susceptibility Testing?" *Journal of Clinical*  
392 *Microbiology* 52 (5): 1705–7.
- 393 Harris, Kathryn A., Anthony Underwood, Dervla T. D. Kenna, Anthony Brooks, Ema  
394 Kavaliunaite, Georgia Kapatai, Rediat Tewolde, Paul Aurora, and Garth Dixon. 2014.  
395 "Whole-Genome Sequencing and Epidemiological Analysis Do Not Provide Evidence for  
396 Cross-Transmission of *Mycobacterium Abscessus* in a Cohort of Pediatric Cystic Fibrosis  
397 Patients." *Clinical Infectious Diseases: An Official Publication of the Infectious Diseases*  
398 *Society of America* 60 (7): 1007–16.
- 399 Hatakeyama, Shuji, Yuki Ohama, Mitsuhiro Okazaki, Yoko Nukui, and Kyoji Moriya. 2017.  
400 "Antimicrobial Susceptibility Testing of Rapidly Growing Mycobacteria Isolated in Japan."  
401 *BMC Infectious Diseases* 17 (1): 197.
- 402 Haworth, Charles S., John Banks, Toby Capstick, Andrew J. Fisher, Thomas Gorsuch, Ian F.  
403 Laurenson, Andrew Leitch, et al. 2017. "British Thoracic Society Guideline for the  
404 Management of Non-Tuberculous Mycobacterial Pulmonary Disease (NTM-PD)." *BMJ*  
405 *Open Respiratory Research* 4 (1): e000242.
- 406 Hunt, Martin, Alison E. Mather, Leonor Sánchez-Busó, Andrew J. Page, Julian Parkhill,  
407 Jacqueline A. Keane, and Simon R. Harris. 2017. "ARIBA: Rapid Antimicrobial Resistance  
408 Genotyping Directly from Sequencing Reads." *Microbial Genomics* 3 (10): e000131.
- 409 Jeong, Suk Hyeon, Su-Young Kim, Hee Jae Huh, Chang-Seok Ki, Nam Yong Lee, Cheol-In  
410 Kang, Doo Ryeon Chung, Kyong Ran Peck, Sung Jae Shin, and Won-Jung Koh. 2017.  
411 "Mycobacteriological Characteristics and Treatment Outcomes in Extrapulmonary  
412 *Mycobacterium Abscessus* Complex Infections." *International Journal of Infectious*  
413 *Diseases: IJID: Official Publication of the International Society for Infectious Diseases* 60  
414 (July): 49–56.
- 415 Jeon, Kyeongman, O. Jung Kwon, Nam Yong Lee, Bum-Joon Kim, Yoon-Hoh Kook, Seung-  
416 Heon Lee, Young Kil Park, Chang Ki Kim, and Won-Jung Koh. 2009. "Antibiotic Treatment  
417 of *Mycobacterium Abscessus* Lung Disease: A Retrospective Analysis of 65 Patients."  
418 *American Journal of Respiratory and Critical Care Medicine* 180 (9): 896–902.
- 419 Kehrmann, Jan, Nermin Kurt, Kai Rueger, Franz-Christoph Bange, and Jan Buer. 2016.  
420 "GenoType NTM-DR for Identifying *Mycobacterium Abscessus* Subspecies and  
421 Determining Molecular Resistance." *Journal of Clinical Microbiology* 54 (6): 1653–55.
- 422 Kim, J., H. Sung, J-S Park, S-H Choi, T-S Shim, and M-N Kim. 2016. "Subspecies Distribution  
423 and Macrolide and Fluoroquinolone Resistance Genetics of *Mycobacterium Abscessus* in  
424 Korea." *The International Journal of Tuberculosis and Lung Disease: The Official Journal of*  
425 *the International Union against Tuberculosis and Lung Disease* 20 (1): 109–14.
- 426 Kim, Su-Young, Sung Jae Shin, Byeong-Ho Jeong, and Won-Jung Koh. 2016. "Successful  
427 Antibiotic Treatment of Pulmonary Disease Caused by *Mycobacterium Abscessus* Subsp.  
428 *Abscessus* with C-to-T Mutation at Position 19 in *erm*(41) Gene: Case Report." *BMC*  
429 *Infectious Diseases* 16 (May): 207.
- 430 Koh, Won-Jung, Byeong-Ho Jeong, Su-Young Kim, Kyeongman Jeon, Kyoung Un Park, Byung

- 431 Woo Jhun, Hyun Lee, et al. 2017. "Mycobacterial Characteristics and Treatment Outcomes  
432 in Mycobacterium Abscessus Lung Disease." *Clinical Infectious Diseases: An Official  
433 Publication of the Infectious Diseases Society of America* 64 (3): 309–16.
- 434 Koh, Won-Jung, Kyeongman Jeon, Nam Yong Lee, Bum-Joon Kim, Yoon-Hoh Kook, Seung-  
435 Heon Lee, Young Kil Park, et al. 2011. "Clinical Significance of Differentiation of  
436 Mycobacterium Massiliense from Mycobacterium Abscessus." *American Journal of  
437 Respiratory and Critical Care Medicine* 183 (3): 405–10.
- 438 Liu, Weijia, Bing Li, Haiqing Chu, Zhemin Zhang, Liulin Luo, Wei Ma, Shiyi Yang, and Qi Guo.  
439 2017. "Rapid Detection of Mutations in erm(41) and Rrl Associated with Clarithromycin  
440 Resistance in Mycobacterium Abscessus Complex by Denaturing Gradient Gel  
441 Electrophoresis." *Journal of Microbiological Methods* 143 (December): 87–93.
- 442 Li, Yan Ming, Xun Liang Tong, Hong Tao Xu, Yang Ju, Meng Cai, and Chen Wang. 2016.  
443 "Prevalence and Antimicrobial Susceptibility of Mycobacterium Abscessus in a General  
444 Hospital, China." *Biomedical and Environmental Sciences: BES* 29 (2): 85–90.
- 445 Magee, John G., and Alan C. Ward. 2015. "Mycobacterium." In *Bergey's Manual of Systematics  
446 of Archaea and Bacteria*. John Wiley & Sons, Ltd.
- 447 Maurer, Florian P., Claudio Castelberg, Chantal Quiblier, Erik C. Böttger, and Akos Somoskövi.  
448 2014. "Erm(41)-Dependent Inducible Resistance to Azithromycin and Clarithromycin in  
449 Clinical Isolates of Mycobacterium Abscessus." *The Journal of Antimicrobial Chemotherapy*  
450 69 (6): 1559–63.
- 451 Mougari, Faiza, Feriel Bouziane, Flora Crockett, Rachid Nessar, Françoise Chau, Nicolas  
452 Veziris, Guillaume Sapriel, Laurent Raskine, and Emmanuelle Cambau. 2017. "Selection of  
453 Resistance to Clarithromycin in Mycobacterium Abscessus Subspecies." *Antimicrobial  
454 Agents and Chemotherapy* 61 (1). <https://doi.org/10.1128/AAC.00943-16>.
- 455 Nash, K. A., B. A. Brown-Elliott, and R. J. Wallace. 2009. "A Novel Gene, erm(41), Confers  
456 Inducible Macrolide Resistance to Clinical Isolates of Mycobacterium Abscessus but Is  
457 Absent from Mycobacterium Chelonae." *Antimicrobial Agents and Chemotherapy* 53 (4):  
458 1367–76.
- 459 Nessar, Rachid, Emmanuelle Cambau, Jean Marc Reyrat, Alan Murray, and Brigitte Gicquel.  
460 2012. "Mycobacterium Abscessus: A New Antibiotic Nightmare." *The Journal of  
461 Antimicrobial Chemotherapy* 67 (4): 810–18.
- 462 Nie, Wenjuan, Hongfei Duan, Hairong Huang, Yu Lu, and Naihui Chu. 2015. "Species  
463 Identification and Clarithromycin Susceptibility Testing of 278 Clinical Nontuberculosis  
464 Mycobacteria Isolates." *BioMed Research International* 2015 (June): 506598.
- 465 Prevots, D. Rebecca, Pamela A. Shaw, Daniel Strickland, Lisa A. Jackson, Marsha A. Raebel,  
466 Mary Ann Blosky, Ruben Montes de Oca, et al. 2010. "Nontuberculous Mycobacterial Lung  
467 Disease Prevalence at Four Integrated Health Care Delivery Systems." *American Journal of  
468 Respiratory and Critical Care Medicine* 182 (7): 970–76.
- 469 Ramírez, Ana, Jacobus H. de Waard, and María Araque. 2015. "Molecular Mechanisms of  
470 Clarithromycin Resistance in Mycobacterium Abscessus Complex Clinical Isolates from  
471 Venezuela." *Journal of Global Antimicrobial Resistance* 3 (3): 205–9.
- 472 Rubio, Marc, Francesca March, Montserrat Garrigó, Carmen Moreno, Montserrat Español, and  
473 Pere Coll. 2015. "Inducible and Acquired Clarithromycin Resistance in the Mycobacterium  
474 Abscessus Complex." *PloS One* 10 (10): e0140166.
- 475 Shallom, Shamira J., Natalia S. Moura, Kenneth N. Olivier, Elizabeth P. Sampaio, Steven M.  
476 Holland, and Adrian M. Zelazny. 2015. "New Real-Time PCR Assays for Detection of  
477 Inducible and Acquired Clarithromycin Resistance in the Mycobacterium Abscessus  
478 Group." *Journal of Clinical Microbiology* 53 (11): 3430–37.
- 479 Tortoli, Enrico, Thomas A. Kohl, Alberto Trovato, Rossella Baldan, Silvia Campana, Lisa  
480 Cariani, Carla Colombo, et al. 2017. "Mycobacterium Abscessus in Patients with Cystic  
481 Fibrosis: Low Impact of Inter-Human Transmission in Italy." *The European Respiratory*



- 482 *Journal: Official Journal of the European Society for Clinical Respiratory Physiology* 50 (1).  
483 <https://doi.org/10.1183/13993003.02525-2016>.
- 484 Votintseva, Antonina A., Louise J. Pankhurst, Luke W. Anson, Marcus R. Morgan, Deborah  
485 Gascoyne-Binzi, Timothy M. Walker, T. Phuong Quan, et al. 2015. "Mycobacterial DNA  
486 Extraction for Whole-Genome Sequencing from Early Positive Liquid (MGIT) Cultures."  
487 *Journal of Clinical Microbiology* 53 (4): 1137–43.
- 488 Walker, Timothy M., Thomas A. Kohl, Shaheed V. Omar, Jessica Hedge, Carlos Del Ojo Elias,  
489 Phelim Bradley, Zamin Iqbal, et al. 2015. "Whole-Genome Sequencing for Prediction of  
490 Mycobacterium Tuberculosis Drug Susceptibility and Resistance: A Retrospective Cohort  
491 Study." *The Lancet Infectious Diseases* 15 (10): 1193–1202.
- 492 Wallace, R. J., Jr, A. Meier, B. A. Brown, Y. Zhang, P. Sander, G. O. Onyi, and E. C. Böttger.  
493 1996. "Genetic Basis for Clarithromycin Resistance among Isolates of Mycobacterium  
494 Chelonae and Mycobacterium Abscessus." *Antimicrobial Agents and Chemotherapy* 40 (7):  
495 1676–81.
- 496 Zhu, Yan Chun, Kara K. Mitchell, Elizabeth J. Nazarian, Vincent E. Escuyer, and Kimberlee A.  
497 Musser. 2015. "Rapid Prediction of Inducible Clarithromycin Resistance in Mycobacterium  
498 Abscessus." *Molecular and Cellular Probes* 29 (6): 514–16.

499

500

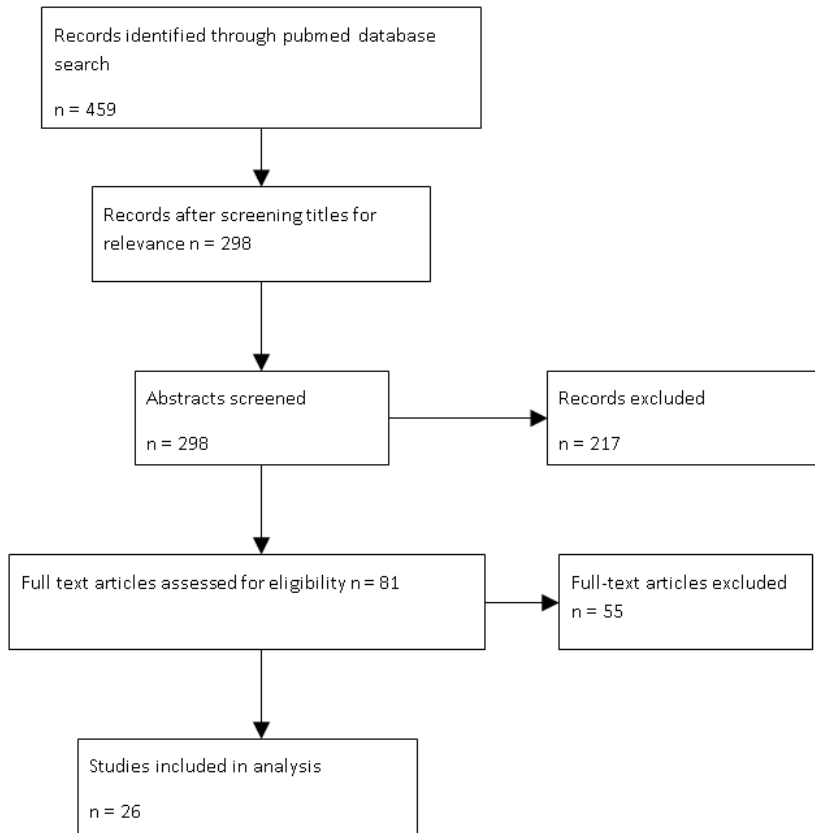

501

502

503 **Figure 1:** Flow diagram showing stages of the systematic literature search

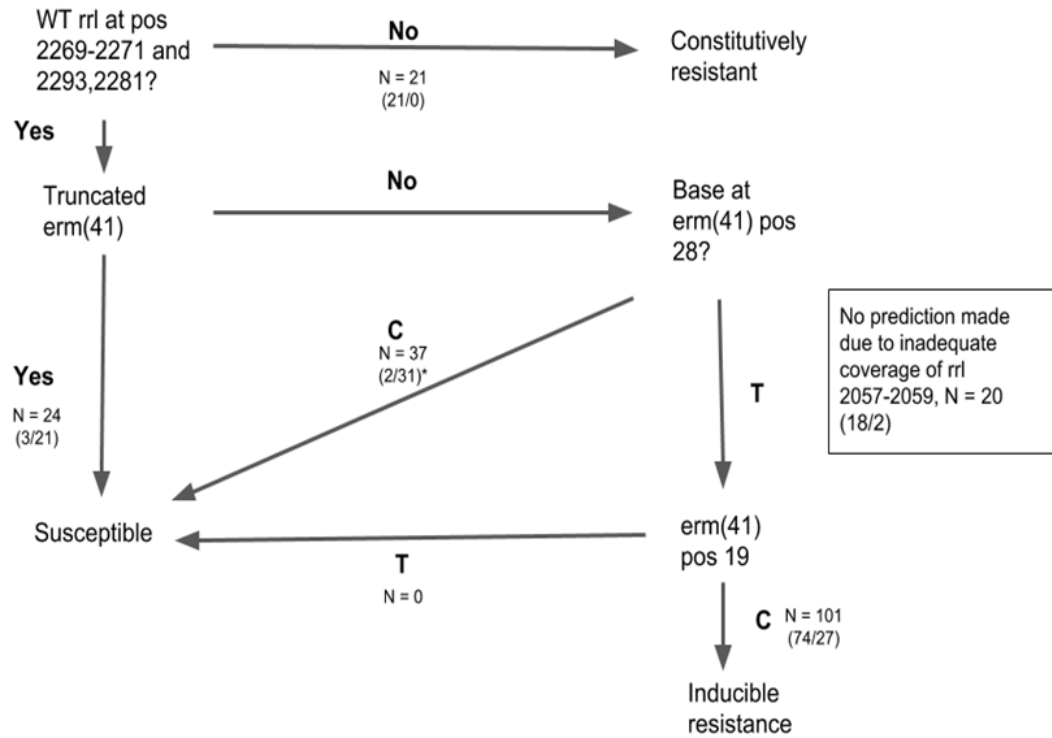

504

505 **Figure 2:** decision algorithm for predicting drug resistance in *M. abscessus* based on the  
506 literature search with numbers of isolates meeting each predictive criterion shown. Bracketed  
507 numbers represent (N resistant / N sensitive). \* 4 isolates had intermediate susceptibility

|                                                        | erm41 pos. 28 | erm41 length | erm41 pos. 19 | rrl. pos 2269 | rrl pos. 2270 | rrl pos. 2271 | N  | Phenotype      | Prediction |
|--------------------------------------------------------|---------------|--------------|---------------|---------------|---------------|---------------|----|----------------|------------|
| <b>Mabs</b>                                            | T             | full         | C             | A             | C             | A             | 5  | 5R             | R          |
|                                                        | T             | full         | C             | A             | T             | A             | 2  | 2R             | R          |
|                                                        | C             | full         | C             | A             | A             | A             | 37 | 4I, 2R,<br>31S | S          |
|                                                        | T             | full         | C             | A             | A             | A             | 87 | 62R,<br>25S    | R          |
| Excluded due to inadequate coverage over rrl 2270-2271 |               |              |               |               |               |               | 12 | 10R 2S         |            |
| <b>Mbol</b>                                            | T             | full         | C             | G             | A             | A             | 1  | 1R             | R          |
|                                                        | T             | full         | C             | A             | G             | A             | 2  | 2R             | R          |
|                                                        | T             | full         | C             | A             | A             | A             | 13 | 11R, 2S        | R          |
| Excluded due to inadequate coverage over rrl 2270-2271 |               |              |               |               |               |               | 4  | 4R             |            |
| <b>Mmas</b>                                            | T             | truncated    | C             | A             | C             | A             | 3  | 3R             | R          |
|                                                        | T             | truncated    | C             | A             | G             | A             | 3  | 3R             | R          |
|                                                        | T             | truncated    | C             | A             | A             | G             | 5  | 5R             | R          |
|                                                        | T             | truncated    | C             | A             | A             | A             | 24 | 21S, 3R        | S          |
|                                                        | T             | full         | C             | A             | A             | A             | 1  | 1R             | R          |
| Excluded due to inadequate coverage over rrl 2270-2271 |               |              |               |               |               |               | 4  | 4R             |            |

**Table 1** - summary of genotypes and corresponding clarithromycin phenotypes for the 203 isolates. Pos - *M. abscessus* numbering position in gene, prediction - genotypic prediction using the algorithm shown in Figure 2, Mabs - *M. abscessus abscessus*, Mbol - *M. abscessus bolletii*, Mmas - *M. abscessus massiliense*, N – total number of isolates with genotype, S – Sensitive, R – Resistant, IR – Inducible Resistance

| <i>erm(41)</i><br>length | <i>erm(41)</i><br>position 28 | <i>rrl</i> position<br>2270 (2058) | <i>rrl</i> position<br>2271 (2059) | Other | Phenotype                                                                                                                                                                                                                                                                                                                 |
|--------------------------|-------------------------------|------------------------------------|------------------------------------|-------|---------------------------------------------------------------------------------------------------------------------------------------------------------------------------------------------------------------------------------------------------------------------------------------------------------------------------|
| Full                     | T                             | A                                  | A                                  |       | Inducible<br>resistance(Ba<br>stian et al.<br>2011; Maurer<br>et al. 2014;<br>Hanson et al.<br>2014; Brown-<br>Elliott et al.<br>2015; Nie et<br>al. 2015;<br>Shallom et al.<br>2015;<br>Ramírez, de<br>Waard, and<br>Araque 2015;<br>Rubio et al.<br>2015; Chua<br>et al. 2015; J.<br>Kim et al.<br>2016;<br>Kehrmann et |

|           |  |   |   |  |                                                                                                                                                                                |
|-----------|--|---|---|--|--------------------------------------------------------------------------------------------------------------------------------------------------------------------------------|
|           |  |   |   |  | al. 2016;<br>Mougari et al.<br>2017; Jeong<br>et al. 2017;<br>Bryant et al.<br>2013;<br>Carvalho et<br>al. 2018;<br>Chew et al.<br>2017)<br>Sensitive(Ch<br>ua et al.<br>2015) |
| Truncated |  | A | A |  | Sensitive(Koh<br>et al. 2011;<br>Hanson et al.<br>2014;<br>Shallom et al.<br>2015;<br>Ramírez, de<br>Waard, and<br>Araque 2015;<br>Chua et al.<br>2015; J. Kim                 |

|      |   |   |   |  |                                                                                                                                                    |
|------|---|---|---|--|----------------------------------------------------------------------------------------------------------------------------------------------------|
|      |   |   |   |  | et al. 2016;<br>Kehrmann et al. 2016;<br>Mougari et al. 2017; Koh et al. 2017;<br>Jeong et al. 2017;<br>Carvalho et al. 2018;<br>Chew et al. 2017) |
| Full | C | A | A |  | Sensitive(Jeong et al. 2017;<br>Mougari et al. 2017;<br>Kehrmann et al. 2016;<br>Chua et al. 2015; Zhu et al. 2015;<br>Ramírez, de Waard, and      |

|                      |        |   |   |  |                                                                                                                                                                                                                            |
|----------------------|--------|---|---|--|----------------------------------------------------------------------------------------------------------------------------------------------------------------------------------------------------------------------------|
|                      |        |   |   |  | Araque 2015;<br>Shallom et al.<br>2015; Nie et<br>al. 2015;<br>Brown-Elliott<br>et al. 2015;<br>Hanson et al.<br>2014; Maurer<br>et al. 2014;<br>Rubio et al.<br>2015;<br>Carvalho et<br>al. 2018;<br>Chew et al.<br>2017) |
| Full or<br>Truncated | C or T | G | A |  | Resistant(Mo<br>ugari et al.<br>2017; Koh et<br>al. 2017;<br>Kehrmann et<br>al. 2016; Li et<br>al. 2016;<br>Rubio et al.<br>2015; Zhu et                                                                                   |



|                      |        |   |   |  |                                                                                                                                                                                                                  |
|----------------------|--------|---|---|--|------------------------------------------------------------------------------------------------------------------------------------------------------------------------------------------------------------------|
|                      |        |   |   |  | al. 2015;<br>Shallom et al.<br>2015; Maurer<br>et al. 2014;<br>Wallace et al.<br>1996; Bastian<br>et al. 2011;<br>Bryant et al.<br>2013;<br>Carvalho et<br>al. 2018; Liu<br>et al. 2017;<br>Chew et al.<br>2017) |
| Full or<br>truncated | C or T | C | A |  | Resistant(Mo<br>ugari et al.<br>2017; Koh et<br>al. 2017;<br>Kehrmann et<br>al. 2016;<br>Shallom et al.<br>2015; Maurer<br>et al. 2014;<br>Bryant et al.                                                         |

|                   |        |   |   |  |                                                                                            |
|-------------------|--------|---|---|--|--------------------------------------------------------------------------------------------|
|                   |        |   |   |  | 2013; Liu et al. 2017)                                                                     |
| Full or truncated | T      | T | A |  | Resistant(Mo ugari et al. 2017; Kehrmann et al. 2016; Bastian et al. 2011)                 |
| Full              |        | A | C |  | Resistant(Mo ugari et al. 2017; Wallace et al. 1996; Bastian et al. 2011; Liu et al. 2017) |
| Full or truncated | T or C | A | G |  | Resistant(Mo ugari et al. 2017; Kehrmann et al. 2016; Li et al. 2016;                      |

|           |         |         |         |                                                     |                                                                                                    |
|-----------|---------|---------|---------|-----------------------------------------------------|----------------------------------------------------------------------------------------------------|
|           |         |         |         |                                                     | Rubio et al. 2015; Shallom et al. 2015; Maurer et al. 2014; Wallace et al. 1996; Chew et al. 2017) |
| Truncated |         | A       | T       |                                                     | Resistant(Bastian et al. 2011)                                                                     |
| Full      | T       | A       | A       | C19T <i>erm(41)</i>                                 | Sensitive(S.-Y. Kim et al. 2016)                                                                   |
| Truncated |         | A       | A       | A2269G <i>rrl</i> (2057)                            | Resistant(Rubio et al. 2015)                                                                       |
| Full      | Unknown | Unknown | Unknown | A2293C <i>rrl</i> (2082) + G2281C <i>rrl</i> (2069) | Resistant(Liu et al. 2017)                                                                         |

**Table 2:** Resistance determining mutations for clarithromycin identified in the literature search.

*M. abscessus* numbering is used with *E. coli* numbering in brackets.

|                           | <b>In vitro phenotype</b> |           |              |
|---------------------------|---------------------------|-----------|--------------|
| <b>Genomic Prediction</b> | Sensitive                 | Resistant | Intermediate |
| No Prediction*            | 2                         | 18        | 0            |
| Inducible resistance      | 27                        | 74        | 0            |
| Resistant                 | 0                         | 21        | 0            |
| Sensitive                 | 52                        | 5         | 4            |
| Sensitivity               | 95% (95% CI 89 - 98%)     |           |              |
| Specificity               | 66% (95% CI 54 - 76)%     |           |              |
| Positive predictive value | 78% (95% CI 69 - 85%)     |           |              |
| Negative predictive value | 91% (95% CI 81.0 - 97%)   |           |              |

**Table 3** - WGS Predictions vs DST phenotype for clarithromycin.

Sensitivity/Specificity/PPV/NPV are calculated excluding isolates with and intermediate phenotype and those where no prediction was made due to inadequate coverage at key positions.

| <b>Position</b> | <b>Nucleotide/Amino acid change</b> | <b>Rule met</b> |
|-----------------|-------------------------------------|-----------------|
|                 |                                     |                 |

|                |       |   |
|----------------|-------|---|
| rrl 2039       | A > G | 1 |
| rrl 1401       | T > C | 2 |
| rrl 371        | T > C | 2 |
| rrl 795        | G > A | 1 |
| rrl 2270*      | A > C | 1 |
| rrl 2270*      | A > G | 2 |
| rrl 2271*      | A > G | 2 |
| rrl 2270 *     | A > T | 2 |
| erm(41) 131    | A > V | 2 |
| rrl 2279       | G > A | 2 |
| rrl 2269*      | A > G | 2 |
| erm (41) -31** | A > T | 2 |
| rrl 1932       | A > G | 2 |

**Table 4:** Mutations (both novel and previously described) detected during *de novo* search for resistance determining SNPs. Rule 1 = occurs as only SNP in relevant regions in resistant isolate, rule 2 = all samples resistant when SNP occurs, never seen in sensitive isolate. All numbering is relative to *M. abscessus*. \* mutation already described in literature - *M. abscessus* rrl numbering 2270/2271 is *E. coli* numbering 2058/2059. \*\* mutation in *erm(41)* promoter region, 31 bases upstream of start of coding region.
